# Supplementary material for: RAG2 mutants alter DSB repair pathway choice in vivo and illuminate the nature of ‘alternative NHEJ’
Source: PubMed Central journal article supplement (PMC4041462; doi:10.1093/nar/gku295), 2014-04-20
Supplement: supp_gku295_SI_index_Gigi_Roth_april_11_2014.pdf [file supp_gku295_SI_index_Gigi_Roth_april_11_2014.pdf]

## Supplementary Information

### Figure S1. Generation of RAG2<sup>FS/FS</sup> knock-in mice.

A. RAG2FS has the highest a-NHEJ activity in-vitro. 293T cells were transiently transfected with full length Rag1, the different Rag2 mutants and the indicated substrate. Recombination was measured 48h post transfection by FACS analysis. Calculations are fold increase over full length Rag2 (RAG2). A. Recombination with RSSs in deletion configuration; RAG2, RAG2Core (a.a1-383) RAG2FS - Frame-shift mutation at amino acid 361, DDE- inactive Rag1. Absolute recombination for RAG2 28%±12. B. Recombination with a-NHEJ substrate (15). \* p<0.0001 vs RAG2, \*\*p<0.001 vs RAG2Core. RAG2 absolute recombination is 0.5%±0.25.

B. Mice were generated in inGenious Targeting Laboratory Inc. A~11.5kb region used to generate the targeting vector was first sub cloned from a positively identified C57/Bl6 BAC clone. Two types of mutations were generated in exon 3 utilizing overlap extension PCR. The first mutation comprised deletion of base 1082 (T) to generate a frameshift. The second mutation is located 67bp 3' of the T deletion and comprised replacement of the last 435bp of coding sequence with the sequence- AAGCGGCCGCGACTCTAG followed by the 3' UTR sequence. First, primers located 5' and 3' to two unique Kpn1 (K) sites that flank the location of the mutations were used to amplify a 1.6kb fragment. The mutations were introduced into this fragment, which was then reintroduced back into the construct via ligation into the Kpn1 sites, thus replacing the wild type Kpn1 fragment with the mutated Kpn1 fragment. The Neo cassette is inserted 228bps 5' to the ATG in exon 3 using Red/ET recombineering technology with a short homology arm that extends ~1.5kb 5' to the Neo cassette. The total size of the targeting construct (including the backbone vector) is 15.3kb. C. Identified F1 heterozygous mice were crossed with Ella-Cre transgenic mice to delete the floxed Neo cassette in vivo. An additional cross between the +/-F mice and wild type mice eliminated the transgene. Subsequent mating of Cre-F2 (RAG2+/-FS) generated littermates with the wild type (+/+), heterozygous (RAG2<sup>+/-FS</sup>) and homozygous (RAG2<sup>FS/FS</sup>) genotypes for analysis. Genotyping analysis was done using the SQ1-GGAGACTCCTGACTGGACCCTCAG and DL1-GATTCAGAGAGCAATATACCT primers. D. Sequence analysis of tail and liver DNA showed an additional amino acid change at T296M that occurred during the targeting. Nevertheless, this change did not affect the FS mutant functionality in our cell system assay allowing us to still use it as a mouse model to investigate our questions.

### Figure S2. T and B cell development in RAG2<sup>FS/FS</sup> knock-in mice.

A. Thymocytes from mice of the indicated genotype were stained with antiCD8-PE-CY7, antiCD4-APC-CY7, antiCD25-APC and antiCD44-PE. B. Summary table of the different B and T cell

populations from 6-8 week old mice n=7. RAG KO ( $RAG^{-/-}$ ) are combined analysis of Rag1 and Rag2 KO n=4. B220+ cells in the BM are gated on IgM-. \*p<0.05 vs WT.

**Figure S3. Signal joints sequences from WT and  $RAG2^{FS/FS}$  mice**

A. SJ from  $V\beta 14-D\beta 1$ . B. SJ from  $V\delta 5-D\delta 2$ . C. SJ from  $V\beta 8.3-D\beta 1.1$  D. SJ from  $V\beta 10-D\beta 1$ . Germ-line sequence of each locus is shown at the top. Capital letters indicate the RSS and small letters were indicated are coding end region. Capital letters in the middle of the junction indicate N nt, deletions are indicated in parentheses, small letter indicates sequences from the coding region (miscleavage), capital bold italics are microhomology and underlined blue are open shut junctions.

**Figure S4. Coding joint sequences from WT and  $RAG2^{FS/FS}$  mice.** Whole thymocytes or BM cells from 2-3 mice were analyzed by PCR amplification of the indicated loci followed by Topo cloning. Germ line sequence is indicated at the top of each locus. Capital letters in the middle of the junction indicate N nt, capital bold are P nt, deletions are indicated in parentheses, small letter indicates sequences from the coding region (miscleavage). A.  $V\beta 6/7/8-J\beta 2$  B.  $V\beta 10-J\beta 2.1$  C.  $V\beta 14-J1.1$ . Blue and red represents the ADRs D.  $D\beta 2-J\beta 2$  (bold small letters represent the 12 RSS) E.  $Vh1783-Jh4$ . F. VH CDR3 length distribution analyzed by CDR3 spectratyping on spleen DNA (54). CDR3 length (bp) is plotted for WT and  $RAG2^{FS/FS}$  mice. Each symbol represents a single rearrangement of J606.1-JH2 (left panel) or J558.82-JH2 (right panel). Each column is an individual mouse of a given genotype (n=3 per genotype). Horizontal bars indicate the median CDR3 length for all of the rearrangements sampled in a single mouse.

**Figure S5.  $RAG2^{FS/FS}$  interchromosomal rearrangements within the antigen receptor loci.**

A. Scheme of the germ-line configuration of TCR beta and delta and the predicted products upon interchromosomal rearrangements. Rectangles represent coding gene segments; triangles represent RSS (Filled -12RSS, open - 23 RSS). The arrows indicate nested PCR primers. B. Sequence analysis of purified PCR products (n=4  $RAG2^{FS/FS}$  mice). Capital letters at the middle of the junction represents N nt, Bold italic are microhomology, deletions are indicated in parentheses and small letters are Sanger sequence that did not align to mouse mm9 database.

**Figure S6. Generation of Adjacent Direct Repeats -ADRs**

A. Scheme showing how small ADRs (adjacent direct repeats) might be generated. The first step may or may not be a mechanistic constraint however it is necessary in the identification of ADRs. We show homologies between ends having been generated by TdT or perhaps another

polymerase (53). Terminal homologies can also be revealed between two ends by resection but were excluded in our analysis because prior existing sequences between ends that can generate ADRs are indistinguishable from simple direct joining products and difficult to score. The next step is stabilizing end-to-end interaction via complementary bases in the two single strand extensions compensating for the lack of Ku80. We suggest that annealing occurs near or at the termini. For the sake of parsimony, we have depicted Fen-1 as the flap removal factor prior to the gap-filling and strand displacement steps. ADRs are then generated when a gap-filling polymerase with strand displacement activity is present. This could be supplied by pol lamda (39), which has sufficient strand displacement activity *in vitro* with the cooperation of Fen-1, to invade three or four bp into a duplex, or by pol beta, which display stronger strand displacement on its own (38). The latter is not a known participant in cNHEJ, but is also stimulated by Fen-1 *in vitro* (39). Following polymerization/strand displacement of one end the second detached end could be either filled in by 'conventional' extension and then ligated or alternatively, ligated and then filled in.

B. Summary of the number of junctions with ADRs detected in our study and by re-examination of published data (23,25). The ADRs are indicated in Blue-Red in Fig.S4. nd stands for Not Done.

#### **Figure S7. RAG2<sup>del352</sup> mice junctions' analysis.**

A. Diagram of the RAG2<sup>del352</sup> allele. A change in RAG2 sequence after amino acid 352 originating from the targeting vector is indicated in red. B. Signal joint analysis from different TCR loci n=2-6. (Analysis was preformed as specified in Table 1). C. D $\delta$ 2-D $\beta$ 1 interchromosomal rearrangements from healthy thymocytes n=3 (Details as specified in Fig.S5). D. RAG2<sup>del352/del352</sup>;Ku80<sup>-/-</sup> antigen receptor rearrangements from the indicated loci n=1-3. (Annotations are as given in Fig.2).

#### **Figure S8. RAG2<sup>FS/FS</sup>;P53<sup>-/-</sup> lymphomas analysis.**

A. FACS analysis of representative wild-type thymus and RAG2<sup>FS/FS</sup>;p53<sup>-/-</sup> thymic lymphomas. B. Endogenous antigen receptor rearrangements detected by whole genome sequencing. Seven endogenous genomic rearrangements detected in tumor 13422. All rearrangements were in the coding end configuration. End1 represents the coding end of a 23RSS; End 2 represents the coding end of 12RSS. Capital letters in the middle are N nt and Bold are P nt.

## **Supplementary Methods**

### **V(D)J recombination assay**

The 293T cell line was grown in DMEM supplemented with fetal bovine serum (10%), non-essential amino acids and penicillin-streptomycin. Cells were grown at 37°C in the presence of 5% CO<sub>2</sub>. To assess V(D)J recombination, 0.5 µg of the indicated murine Rag1, murine Rag2 and recombination substrate were transfected into cells using a FuGENE 6:DNA ratio of 3:1. Forty-eight hours after transfection cells were harvested and fluorescent intensity was measured using BD LSR II for FACS readout.

### **Spectratyping**

Immunoglobulin heavy chain repertoire analysis was performed using CDR3 spectratyping, as described (54). Briefly, genomic DNA from splenocytes was purified using PureGene and amplified using the J606.1 and the J558.85 VH primers and a fluorescent labeled JH2 reverse primer. 2 µL of PCR product per reaction were resolved by capillary electrophoresis on an ABI 3100 analyzer (Applied Biosciences Inc). Peak scanner v. 1.0 was used to generate and analyze the spectratypes (Applied Biosciences Inc) as described (54).

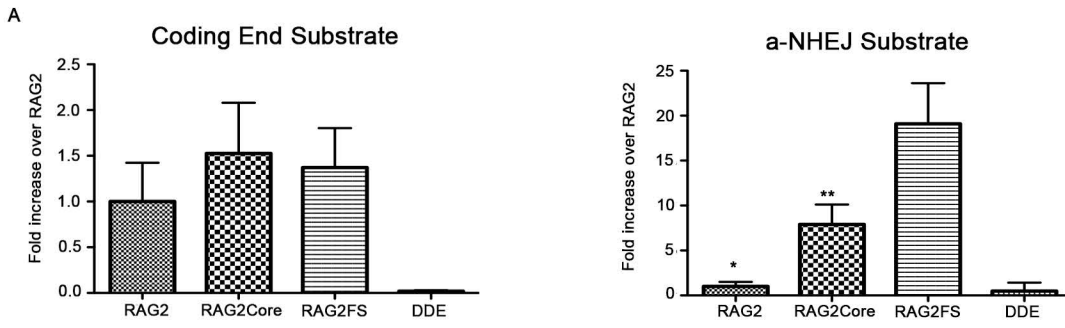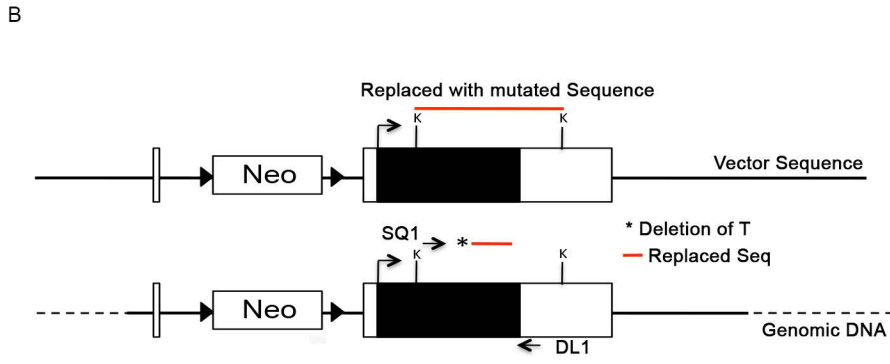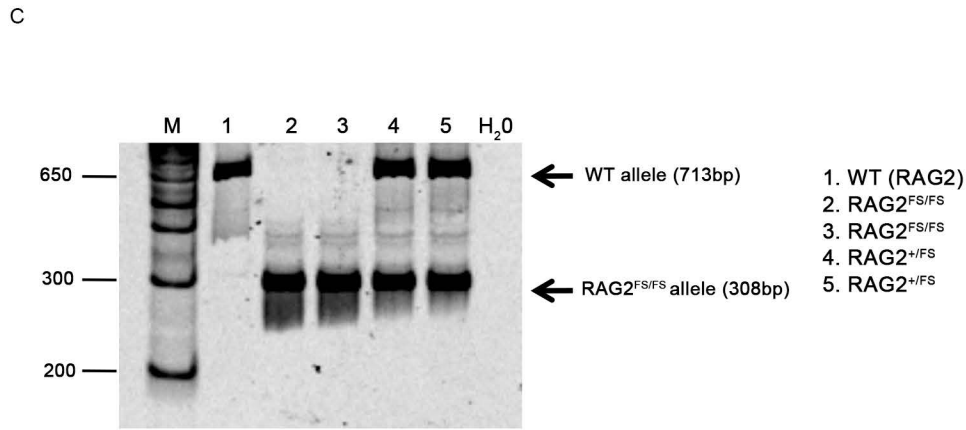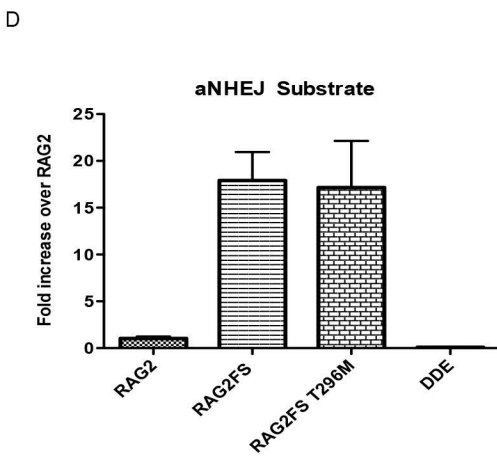

Fig. S1

A. Thymus

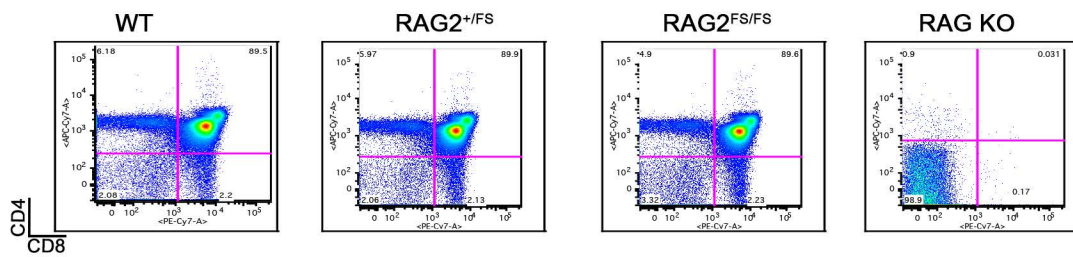

Gated on CD4<sup>+</sup>CD8<sup>-</sup>

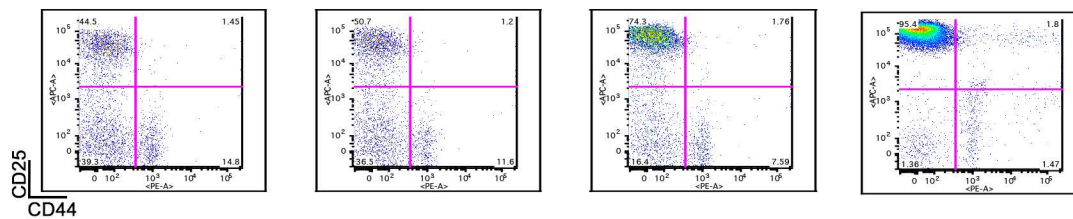

| B. Thymus                   | % CD4 <sup>+</sup> CD8 <sup>+</sup> | %CD4 <sup>-</sup> CD8 <sup>-</sup> | % CD44 <sup>-</sup> CD25 <sup>+</sup> | % CD44 <sup>-</sup> CD25 <sup>-</sup> |
|-----------------------------|-------------------------------------|------------------------------------|---------------------------------------|---------------------------------------|
| WT                          | 88.37±1.59                          | 1.85±0.46                          | 38.92±11.81                           | 46.10±11.73                           |
| RAG2 <sup>+/FS</sup>        | 87.74±2.96                          | 2.44±0.45                          | 42.06±12.31                           | 42.63±14.48                           |
| <b>RAG2<sup>FS/FS</sup></b> | <b>88.20±2.25</b>                   | <b>3.02±0.63*</b>                  | <b>65.09±6.23*</b>                    | <b>22.42±6.67*</b>                    |
| RAG <sup>-/-</sup>          | 0.06±0.00                           | 99.10±0.28                         | 95.5±1.13                             | 1.71±1.06                             |

  

| BM                          | % IgM <sup>+</sup> | % IgM <sup>-</sup> | % B220 <sup>+</sup> CD43 <sup>+</sup> | % B220 <sup>+</sup> CD43 <sup>-</sup> |
|-----------------------------|--------------------|--------------------|---------------------------------------|---------------------------------------|
| WT                          | 42.2±13.7          | 52.1±17.1          | 16.3±3.5                              | 51.6±15.5                             |
| RAG2 <sup>+/FS</sup>        | 43.0±5.1           | 52.3±9.9           | 14.4±4.5                              | 49.6±15.6                             |
| <b>RAG2<sup>FS/FS</sup></b> | <b>31.6±7.4</b>    | <b>63.9±13.2</b>   | <b>24.0±2.7*</b>                      | <b>39.1±11.4</b>                      |
| RAG <sup>-/-</sup>          | 1±0                | 99±0               | 16.8±1.9                              | 1.7±0.25                              |

  

| Spleen                      | % CD4 <sup>+</sup> | %CD8 <sup>+</sup> | % B220 <sup>+</sup> IgM <sup>+</sup> |
|-----------------------------|--------------------|-------------------|--------------------------------------|
| WT                          | 17.2±1.5           | 7.7±1.4           | 35±3.1                               |
| <b>RAG2<sup>FS/FS</sup></b> | <b>14.7±1.9</b>    | <b>8.2±1.2</b>    | <b>29.3±4.4</b>                      |
| RAG <sup>-/-</sup>          | 2.5±1.7            | 0.4±0.4           | 0.06±0.09                            |

Fig. S2

|                                             |            |                                                |                                       |  |  |
|---------------------------------------------|------------|------------------------------------------------|---------------------------------------|--|--|
| <b>A</b>                                    |            |                                                | <b>Dβ1</b>                            |  |  |
| Vβ14                                        |            |                                                | ccctgtcccCACAATGTTACAGCTTTATACAAAAAGG |  |  |
| GCACAGATGCTGCCCCACCTACTCAGTGTGagact         |            |                                                |                                       |  |  |
| <b>WT</b>                                   |            |                                                |                                       |  |  |
| GCACAGATGCTGCCCCACCTACTCAGTGTG              | ACCCCCCT   | CACAATGTTACAGCTTTATACAAAAAGG                   |                                       |  |  |
| GCACAGATGCTGCCCCACCTACTCAGTGTG              | GACGG      | CACAATGTTACAGCTTTATACAAAAAGG                   |                                       |  |  |
| GCACAGATGCTGCCCCACCTACTCAGTGTG              | CCAG       | CACAATGTTACAGCTTTATACAAAAAGG                   |                                       |  |  |
| GCACAGATGCTGCCCCACCTACTCAGTGTG              | CCC        | CACAATGTTACAGCTTTATACAAAAAGG                   |                                       |  |  |
| GCACAGATGCTGCCCCACCTACTCAGTGTG              | GTC        | CACAATGTTACAGCTTTATACAAAAAGG                   |                                       |  |  |
| GCACAGATGCTGCCCCACCTACTCAGTGTG              | CT         | CACAATGTTACAGCTTTATACAAAAAGG                   |                                       |  |  |
| GCACAGATGCTGCCCCACCTACTCAGTGTG              | GG         | CACAATGTTACAGCTTTATACAAAAAGG                   |                                       |  |  |
| GCACAGATGCTGCCCCACCTACTCAGTGTG              | CC         | CACAATGTTACAGCTTTATACAAAAAGG                   |                                       |  |  |
| GCACAGATGCTGCCCCACCTACTCAGTGTG              | T          | CACAATGTTACAGCTTTATACAAAAAGG                   |                                       |  |  |
| GCACAGATGCTGCCCCACCTACTCAGTGTG              | G          | CACAATGTTACAGCTTTATACAAAAAGG                   |                                       |  |  |
| GCACAGATGCTGCCCCACCTACTCAGTGTGagact         |            | CACAATGTTACAGCTTTATACAAAAAGG                   |                                       |  |  |
| <b>RAG2<sup>FS/FS</sup></b>                 |            |                                                |                                       |  |  |
| GCACAGATGCTGCCCCACCTACTCAGTGTG              | GCCT       | CACAATGTTACAGCTTTATACAAAAAGG                   |                                       |  |  |
| GCACAGATGCTGCCCCACCTACTCAGTGTG              | ACCG       | CACAATGTTACAGCTTTATACAAAAAGG                   |                                       |  |  |
| GCACAGATGCTGCCCCACCTACTCAGTGTG              | CCC        | CACAATGTTACAGCTTTATACAAAAAGG                   |                                       |  |  |
| GCACAGATGCTGCCCCACCTACTCAGTGTG              | GG         | CACAATGTTACAGCTTTATACAAAAAGG                   |                                       |  |  |
| GCACAGATGCTGCCCCACCTACTCAGTGTG              | TC         | CACAATGTTACAGCTTTATACAAAAAGG                   |                                       |  |  |
| GCACAGATGCTGCCCCACCTACTCAGTGTG              | CT         | CACAATGTTACAGCTTTATACAAAAAGG                   |                                       |  |  |
| GCACAGATGCTGCCCCACCTACTCAGTGTG              | GA         | CACAATGTTACAGCTTTATACAAAAAGG                   |                                       |  |  |
| GCACAGATGCTGCCCCACCTACTCAGTGTG              | GT         | CACAATGTTACAGCTTTATACAAAAAGG                   |                                       |  |  |
| GCACAGATGCTGCCCCACCTACTCAGTGTG              | G          | CACAATGTTACAGCTTTATACAAAAAGG                   |                                       |  |  |
| GCACAGATGCTGCCCCACCTACTCAGTGTG              | T          | CACAATGTTACAGCTTTATACAAAAAGG                   |                                       |  |  |
| GCACAGATGCTGCCCCACCTACTCAGTGTG              | 350bp      | CACAATGTTACAGCTTTATACAAAAAGG                   |                                       |  |  |
| GCACAGATGCTGCCCCACCTACTCAGTGTG              | GGGT       | TTACAGCTTTATACAAAAAGG (-7)                     |                                       |  |  |
| GCACAGATGCTGCCCCACCTACTCAGTGTG              | G          | AATGTTACAGCTTTATACAAAAAGG (-3)                 |                                       |  |  |
| GCACAGATGCTGCCCCACCTACTCAGTGTG              |            | ATGTTACAGCTTTATACAAAAAGG (-4)                  |                                       |  |  |
| GCACAGATGCTGCCCCACCTACTCAGTGTG (-2)         | CGCC       | CACAATGTTACAGCTTTATACAAAAAGG                   |                                       |  |  |
| GCACAGATGCTGCCCCACCTACTCAGTGTG (-10)        |            | ATGTTACAGCTTTATACAAAAAGG (-4)                  |                                       |  |  |
| GCACAGATGCTGCCCCACCTACTCAGTGTG (-12)        |            | TTACAGCTTTATACAAAAAGG (-7)                     |                                       |  |  |
| GCACAGATGCTGCTGC (-18)                      |            | TTTATACAAAAAGG (-14)                           |                                       |  |  |
| TGTGGT (-36)                                |            | CTACC (-43)                                    |                                       |  |  |
| TCCTAG (-81)                                |            | CTGC (-79)                                     |                                       |  |  |
| GCACAGATGCTGCCCCACCTACTCAGTGTGagact         | CTG        | ccctgtcccCACAATGTTACAGCTTTATACAAAAAGG          |                                       |  |  |
| GCACAGATGCTGCCCCACCTACTCAGTGTGagactc        | GGT        | ccctgtcccCACAATGTTACAGCTTTATACAAAAAGG          |                                       |  |  |
| GCACAGATGCTGCCCCACCTACTCAGTGTGagact         |            | ccctgtcccCACAATGTTACAGCTTTATACAAAAAGG          |                                       |  |  |
| <b>B</b>                                    |            |                                                |                                       |  |  |
| Vδ5                                         |            |                                                |                                       |  |  |
| GGTTTGGGTACAGGCTCCCTGGGCACCTGCACCACAGTG     |            |                                                |                                       |  |  |
| <b>WT</b>                                   |            |                                                |                                       |  |  |
| GGTTTGGGTACAGGCTCCCTGGGCACCTGCACCACAGTG     | CTT        | CACGGTGCTACAGAGCTTTGCAAAAACC                   |                                       |  |  |
| GGTTTGGGTACAGGCTCCCTGGGCACCTGCACCACAGTG     | GTT        | CACGGTGCTACAGAGCTTTGCAAAAACC                   |                                       |  |  |
| GGTTTGGGTACAGGCTCCCTGGGCACCTGCACCACAGTG     | GGT        | CACGGTGCTACAGAGCTTTGCAAAAACC                   |                                       |  |  |
| GGTTTGGGTACAGGCTCCCTGGGCACCTGCACCACAGTG     | GCCATCA    | CACGGTGCTACAGAGCTTTGCAAAAACC                   |                                       |  |  |
| GGTTTGGGTACAGGCTCCCTGGGCACCTGCACCACAGTG     | GA         | CACGGTGCTACAGAGCTTTGCAAAAACC                   |                                       |  |  |
| GGTTTGGGTACAGGCTCCCTGGGCACCTGCACCACAGTG     | GGAT       | CACGGTGCTACAGAGCTTTGCAAAAACC                   |                                       |  |  |
| GGTTTGGGTACAGGCTCCCTGGGCACCTGCACCACAGTG     | GG         | CGGTGCTACAGAGCTTTGCAAAAACC (-2)                |                                       |  |  |
| GGTTTGGGTACAGGCTCCCTGGGCACCTGCACCACAG (-2)  | GGCG       | CACGGTGCTACAGAGCTTTGCAAAAACC                   |                                       |  |  |
| GGTTTGGGTACAGGCTCCCTGGGCACCTGCACCACAG (-2)  | CTT        | ACGGTGCTACAGAGCTTTGCAAAAACC (-1)               |                                       |  |  |
| <b>RAG2<sup>FS/FS</sup></b>                 |            |                                                |                                       |  |  |
| GGTTTGGGTACAGGCTCCCTGGGCACCTGCACCACAGTG     | CCCCC      | CACGGTGCTACAGAGCTTTGCAAAAACC                   |                                       |  |  |
| GGTTTGGGTACAGGCTCCCTGGGCACCTGCACCACAGTG     | GGGG       | CACGGTGCTACAGAGCTTTGCAAAAACC                   |                                       |  |  |
| GGTTTGGGTACAGGCTCCCTGGGCACCTGCACCACAGTG     | TT         | CACGGTGCTACAGAGCTTTGCAAAAACC                   |                                       |  |  |
| GGTTTGGGTACAGGCTCCCTGGGCACCTGCACCACAGTG     | GT         | GGTGCTACAGAGCTTTGCAAAAACC (-3)                 |                                       |  |  |
| GGTTTGGGTACAGGCTCCCTGGGCACCTGCACCACAGTG     | TCCCAGT    | TGCTACAGAGCTTTGCAAAAACC (-5)                   |                                       |  |  |
| GGTTTGGGTACAGGCTCCCTGGGCACCTGCACCACAG (-2)  |            | CGGTGCTACAGAGCTTTGCAAAAACC (-2)                |                                       |  |  |
| GGTTTGGGTACAGGCTCCCTGGGCACCTGCACCACAG (-2)  | GG         | GCTACAGAGCTTTGCAAAAACC (-6)                    |                                       |  |  |
| GGTTTGGGTACAGGCTCCCTGGGCACCTGCACCACAG (-2)  | AGGGGGCCT  | CTACAGAGCTTTGCAAAAACC (-7)                     |                                       |  |  |
| GGTTTGGGTACAGGCTCCCTGGGCACCTGCACCACAG (-3)  | A          | GGTGCTACAGAGCTTTGCAAAAACC (-3)                 |                                       |  |  |
| GGTTTGGGTACAGGCTCCCTGGGCACCTGCACCACAG (-6)  | CCTCGT     | TGCTACAGAGCTTTGCAAAAACC (-5)                   |                                       |  |  |
| GGTTTGGGTACAGGCTCCCTGGGCACCTGC (-10)        |            | CCTGGGCTTT (-31)                               |                                       |  |  |
| GGTTTGGGTACAGGCTCCCTGGGCAC (-13)            | AA         | ACGGTGCTACAGAGCTTTGCAAAAACC (-1)               |                                       |  |  |
| GGTTTGGGTACAGGCTCCCTGGGCACCTGCACCACAG (-15) |            | TTT (-38)                                      |                                       |  |  |
| GGTTTGGGTACAGGC (-24)                       |            | CTACAGAGCTTTGCAAAAACC (-7)                     |                                       |  |  |
| CAGGGTTTG (-32)                             |            | TA (-42)                                       |                                       |  |  |
| GG (-59)                                    |            | CCCCAG (-62)                                   |                                       |  |  |
| GGTTTGGGTACAGGCTCCCTGGGCACCTGCACCACA (-3)   | CCAAG      | ctcgtatccctccgatCACGGTGCTACAGAGCTTTGCAAAAACC   |                                       |  |  |
| GGTTTGGGTACAGGCTCCCTGGGCACCTGCACCACA (-3)   | ATTATGCGCG | gtatccctccgTTATTTTGCTACAGAGCTTTGCAAAAACC (-5)  |                                       |  |  |
| GGTTTGGGTACAGGCTCCCTGGGCACCTGCACCAC (-4)    | TAG        | ctcgtatccctccgTCTGTGCTACAGAGCTTTGCAAAAACC (-4) |                                       |  |  |
| GGTTTGGGTACAGGCTCCCTGGGCACCTGCACC (-6)      | TAG        | ctcgtatccctccgatCACGGTGCTACAGAGCTTTGCAAAAACC   |                                       |  |  |

Fig. S3

|                                                     |             |                                               |
|-----------------------------------------------------|-------------|-----------------------------------------------|
| <b>C</b>                                            |             |                                               |
| Vβ8.3                                               |             | Dβ1.1                                         |
| ACTTTCTGTGCAAAGGGGAGGAAGCCACACATCACTGTG             | CCCCCTGTCCC | cccctgtcccCACAATGTTACAGCTTTATACAAAAAAG        |
| <b>WT</b>                                           |             |                                               |
| ACTTTCTGTGCAAAGGGGAGGAAGCCACACATCACTGTG             | AA          | CACAATGTTACAGCTTTATACAAAAAAG                  |
| ACTTTCTGTGCAAAGGGGAGGAAGCCACACATCACTGTG             | GG          | CACAATGTTACAGCTTTATACAAAAAAG                  |
| ACTTTCTGTGCAAAGGGGAGGAAGCCACACATCACTGTG             | GG          | CACAATGTTACAGCTTTATACAAAAAAG                  |
| ACTTTCTGTGCAAAGGGGAGGAAGCCACACATCACTGTG             | G           | CACAATGTTACAGCTTTATACAAAAAAG                  |
| ACTTTCTGTGCAAAGGGGAGGAAGCCACACATCACTGTG             | C           | CACAATGTTACAGCTTTATACAAAAAAG                  |
| ACTTTCTGTGCAAAGGGGAGGAAGCCACACATCACTGTG             | CCCCCA      | AATGTTACAGCTTTATACAAAAAAG (-3)                |
| ACTTTCTGTGCAAAGGGGAGGAAGCCACACATCACTGTG             | TCATAG      | TGTTACAGCTTTATACAAAAAAG (-5)                  |
| ACTTTCTGTGCAAAGGGGAGGAAGCCACACATCACTG (-2)          | CGGG        | CACAATGTTACAGCTTTATACAAAAAAG                  |
| <b>RAG<sup>2FS/FS</sup></b>                         |             |                                               |
| ACTTTCTGTGCAAAGGGGAGGAAGCCACACATCACTGTG             | CTCCCTC     | CACAATGTTACAGCTTTATACAAAAAAG                  |
| ACTTTCTGTGCAAAGGGGAGGAAGCCACACATCACTGTG             | TCCTCC      | CACAATGTTACAGCTTTATACAAAAAAG                  |
| ACTTTCTGTGCAAAGGGGAGGAAGCCACACATCACTGTG             | GGGGA       | CACAATGTTACAGCTTTATACAAAAAAG                  |
| ACTTTCTGTGCAAAGGGGAGGAAGCCACACATCACTGTG             | GGC         | CACAATGTTACAGCTTTATACAAAAAAG                  |
| ACTTTCTGTGCAAAGGGGAGGAAGCCACACATCACTGTG             | GGT         | CACAATGTTACAGCTTTATACAAAAAAG                  |
| ACTTTCTGTGCAAAGGGGAGGAAGCCACACATCACTGTG             | CC          | CACAATGTTACAGCTTTATACAAAAAAG                  |
| ACTTTCTGTGCAAAGGGGAGGAAGCCACACATCACTGTG             | CC          | CACAATGTTACAGCTTTATACAAAAAAG                  |
| ACTTTCTGTGCAAAGGGGAGGAAGCCACACATCACTGTG             | GG          | CACAATGTTACAGCTTTATACAAAAAAG                  |
| ACTTTCTGTGCAAAGGGGAGGAAGCCACACATCACTGTG             | C           | cccCACAATGTTACAGCTTTATACAAAAAAG               |
| ACTTTCTGTGCAAAGGGGAGGAAGCCACA (-10)                 | TT          | ccctgtcccCACAATGTTACAGCTTTATACAAAAAAG         |
| ACTTTCTGTGCAAAGGGGAGGAAGCCAC (-11)                  | TCCTTA      | cccctgtcccCACAATGTTACAGCTTTATACAAAAAAG        |
| ACTTTCTGTGCAAAGGGGAGGAAGCC (-13)                    | GCCT        | cccctgtcccCACAATGTTACAGCTTTATACAAAAAAG        |
| ACTTC (-72)                                         | A           | ctgtcccCACAATGTTACAGCTTTATACAAAAAAG           |
| <b>D</b>                                            |             |                                               |
| Vβ10                                                |             | Dβ1.1                                         |
| TGGGTTTGTGCACAGGGAACAGTGACTCTGCACAACCTGTGtcttagetgc |             | gccccctgtcccCACAATGTTACAGCTTTATACAAAAAAGGACCC |
| <b>WT</b>                                           |             |                                               |
| TGGGTTTGTGCACAGGGAACAGTGACTCTGCACAACCTGTG           | AGCGT       | CACAATGTTACAGCTTTATACAAAAAAGGACCC             |
| TGGGTTTGTGCACAGGGAACAGTGACTCTGCACAACCTGTG           | GGT         | CACAATGTTACAGCTTTATACAAAAAAGGACCC             |
| TGGGTTTGTGCACAGGGAACAGTGACTCTGCACAACCTGTG           | CC          | CACAATGTTACAGCTTTATACAAAAAAGGACCC             |
| TGGGTTTGTGCACAGGGAACAGTGACTCTGCACAACCTGTG           | GC          | CACAATGTTACAGCTTTATACAAAAAAGGACCC             |
| TGGGTTTGTGCACAGGGAACAGTGACTCTGCACAACCTGTG           | GC          | CACAATGTTACAGCTTTATACAAAAAAGGACCC             |
| TGGGTTTGTGCACAGGGAACAGTGACTCTGCACAACCTGTG           | GG          | CACAATGTTACAGCTTTATACAAAAAAGGACCC             |
| <b>RAG<sup>2FS/FS</sup></b>                         |             |                                               |
| TGGGTTTGTGCACAGGGAACAGTGACTCTGCACAACCTGTG           | 26bp        | cccctgtcccCACAATGTTACAGCTTTATACAAAAAAGGACCC   |
| TGGGTTTGTGCACAGGGAACAGTGACTCTGCACAACCTGTG           | GGTCACG     | ATGTTACAGCTTTATACAAAAAAGGACCC (-4)            |
| TGGGTTTGTGCACAGGGAACAGTGACTCTGCgCAACTGTG            | GGACT       | CACAATGTTACAGCTTTATACAAAAAAGGACCC             |
| TGGGTTTGTGCACAGGGAACAGTGACTCTGCACAACCTGTG           | AC          | CACAATGTTACAGCTTTATACAAAAAAGGACCC             |
| TGGGTTTGTGCACAGGGAACAGTGACTCTGCACAACCTGTGtcttagetgc | G           | gccccctgtcccCACAATGTTACAGCTTTATACAAAAAAGGACCC |
| TGGGTTTGTGCACAGGGAACAGTGACTCTGCACAACCTGTG           | C           | CACAATGTTACAGCTTTATACAAAAAAGGACCC             |
| TGGGTTTGTGCACAGGGAACAGTGACTCTGC <b>CACAA</b> (-5)   |             | TGTTACAGCTTTATACAAAAAAGGACCC (-5)             |

Fig. S3



| A                     |                                    | Dβ1/2 |                     |                              |                                 |
|-----------------------|------------------------------------|-------|---------------------|------------------------------|---------------------------------|
| Vβ8.2                 | GTACTTCTGTGCCAGCGGTGATG            |       | GGGACAGGGGGC        | AGTCAAACACCTTGTACTTTGGGCCA   | Jβ2.4                           |
| Vβ8.1                 | TATATTTCTGTGCCAGCAGTGATG           |       | GGGACTGGGGGGGC      | AACCAAGACACCCAGTACTTTGGGCCA  | Jβ2.5                           |
| Vβ7                   | TGTACTTCTGTGCTAGCAGTTTATC          |       |                     | CTCCTATGAACAGTACTTCGGTCCCGG  | Jβ2.7                           |
| Vβ6                   | TTTTTCTCTGTGCCAGCAGTATAG           |       |                     |                              |                                 |
| WT                    |                                    |       |                     |                              |                                 |
|                       | GTACTTCTGTGCCAGCGGTGATG            | TC    |                     | AAGACACCCAGTACTTTGGGCCA (-4) |                                 |
|                       | TTTTTCTCTGTGCCAGCAGTATAG           |       | (-4) CTGGGG (-4)    | GACACCCAGTACTTTGGGCCA (-6)   |                                 |
|                       | TATATTTCTGTGCCAGCAGTGATG           | G     | GGGACAGGG (-3)      | AAGACACCCAGTACTTTGGGCCA (-4) |                                 |
|                       | TATATTTCTGTGCCAGCAGTGATG           | C     | GGGGG               | AC                           | GAACAGTACTTCGGTCCCGG (-7)       |
|                       | TGTACTTCTGTGCTAGCAGTTTATC          |       | (-4) CAGGG (-3)     | ATGAACAGTACTTCGGTCCCGG (-5)  |                                 |
|                       | GTACTTCTGTGCCAGCGGTGAT (-1)        |       |                     | AATC                         | TATGAACAGTACTTCGGTCCCGG (-4)    |
|                       | GTACTTCTGTGCCAGCGGTGAT (-1)        | A     | (-6) GGGGGGGC       | GCCGG                        | CACCCAGTACTTTGGGCCA (-8)        |
|                       | GTACTTCTGTGCCAGCGGTGAT (-1)        |       | (-4) CTGGG (-5)     | AA                           | GAACAGTACTTCGGTCCCGG (-7)       |
|                       | TTTTTCTCTGTGCCAGCAGTATA (-1)       |       | (-5) AGGGG (-2)     | A                            | ATGAACAGTACTTCGGTCCCGG (-4)     |
|                       | TTTTTCTCTGTGCCAGCAGTATA (-1)       | CC    | GGGGC               | G                            | CCAAGACACCCAGTACTTTGGGCCA (-2)  |
|                       | TATATTTCTGTGCCAGCAGTGAT (-1)       | C     | (-4) CAGGGGG (-1)   | GTTTAGC                      | ACAGTACTTCGGTCCCGG (-9)         |
|                       | GTACTTCTGTGCTAGCAGTT (-2)          |       | (-4) CTGGGGGGC      | GCCGG                        | CCAAGACACCCAGTACTTTGGGCCA (-2)  |
|                       | TATATTTCTGTGCCAGCAGTGA (-2)        |       | (-4) CTGGGGGGG (-1) |                              | ATGAACAGTACTTCGGTCCCGG (-5)     |
|                       | TGTACTTCTGTGCTAGCAGTTA (-2)        |       | GGGGC               | G                            | ACCAAGACACCCAGTACTTTGGGCCA (-1) |
|                       | GTACTTCTGTGCCAGCGGTG (-3)          | T     | (-4) CTGG (-6)      | TCT                          | AGTCAAACACCTTGTACTTTGGTGGC      |
|                       | GTACTTCTGTGCCAGCGGTG (-3)          |       | GC                  | CCAA                         | TCAAACACCTTGTACTTTGGTGGC (-2)   |
|                       | TGTACTTCTGTGCTAGCAGTT (-3)         |       | (-5) AGGGGGC        | G                            | ACCAAGACACCCAGTACTTTGGGCCA (-1) |
|                       | TGTACTTCTGTGCTAGCAGTT (-4)         |       | (-3) ACAGGGG (-2)   | T                            | CAAGACACCCAGTACTTTGGGCCA (-3)   |
|                       | TGTACTTCTGTGCTAGCAG (-6)           | CC    | (-2) GACAGGG (-3)   | ATGG                         | GAACAGTACTTCGGTCCCGG (-7)       |
|                       | TGTACTTCTGTGCTAGCAG (-6)           | CCTCC | GGGACTGGGGG (-3)    | AT                           | CTATGAACAGTACTTCGGTCCCGG (-3)   |
|                       | TGTACTTCTGTGCTAGC (-8)             |       | T                   |                              | CAAGACACCCAGTACTTTGGGCCA (-3)   |
|                       | TGTACTTCTGTGCTAGC (-8)             | T     | (-5) TGGGG (-4)     | A                            | AAGACACCCAGTACTTTGGGCCA (-4)    |
|                       | TGTACTTCTGTGCTA (-10)              | CCCAG | (-5) TGGGGGG (-2)   |                              | ATGAACAGTACTTCGGTCCCGG (-5)     |
| RAG2 <sup>FS/FS</sup> |                                    |       |                     |                              |                                 |
|                       | GTACTTCTGTGCCAGCGGTGATG            | CGT   | (-4) CAGGG (-3)     | TCCCC                        | AAGACACCCAGTACTTTGGGCCA (-4)    |
|                       | GTACTTCTGTGCCAGCGGTGATG            | C     | GG                  |                              | GAACAGTACTTCGGTCCCGG (-7)       |
|                       | TATATTTCTGTGCCAGCAGTGATG           | CAG   | (-5) AGGG (-3)      | ACATCT                       | AGACACCCAGTACTTTGGGCCA (-5)     |
|                       | TTTTTCTCTGTGCCAGCAGTATAG           |       | (-4) ACGGG (-3)     | TGGG                         | TATGAACAGTACTTCGGTCCCGG (-4)    |
|                       | TTTTTCTCTGTGCCAGCAGTATAG           |       | (-3) ACTGGGGGG (-1) | ACGAGGA                      | GAACAGTACTTCGGTCCCGG (-7)       |
|                       | TTTTTCTCTGTGCCAGCAGTATAG           |       | (-5) AGGGGG (-1)    | G                            | TGAACAGTACTTCGGTCCCGG (-6)      |
|                       | GTACTTCTGTGCCAGCGGTGAT (-1)        | T     | (-4) CAGGGGG (-2)   | GATAAG                       | CACCCAGTACTTTGGGCCA (-8)        |
|                       | GTACTTCTGTGCCAGCGGTGAT (-1)        | CG    | (-4) CTGGGGGG (-2)  |                              | ACCAAGACACCCAGTACTTTGGGCCA (-1) |
|                       | GTACTTCTGTGCCAGCGGTGAT (-1)        | AGA   | (-5) TGGGG (-4)     | AT                           | TATGAACAGTACTTCGGTCCCGG (-4)    |
|                       | TATATTTCTGTGCCAGCAGTGA (-2)        | C     | GGGG                | GATTGATCGGGG                 | ACCAAGACACCCAGTACTTTGGGCCA (-1) |
|                       | TATATTTCTGTGCCAGCAGTGA (-2)        | A     | (-1) GGACTGGGGGGG   | TA                           | GAACAGTACTTCGGTCCCGG (-7)       |
|                       | TTTTTCTCTGTGCCAGCAGTAT (-2)        | AAC   | GGC                 | AG                           | AAGACACCCAGTACTTTGGGCCA (-4)    |
|                       | TGTACTTCTGTGCTAGCAGTTT (-3)        | C     | (-2) GACAG (-5)     |                              | CTCCTATGAACAGTACTTCGGTCCCGG     |
|                       | TGTACTTCTGTGCTAGCAGTTT (-3)        | GTCT  | (-4) CAGGG (-3)     | ATGAG                        | GTACTTCGGTCCCGG (-12)           |
|                       | TGTACTTCTGTGCTAGCAGTTT (-3)        |       | (-2) GACAGGGGGC     | AGG                          | GACACCCAGTACTTTGGGCCA (-6)      |
|                       | TGTACTTCTGTGCTAGCAGTTT (-3)        | G     | AGGGGGC             | GG                           | GAACAGTACTTCGGTCCCGG (-7)       |
|                       | TATATTTCTGTGCCAGCAGT (-4)          | CCCT  | (-2) GACAGGG (-3)   | AGG                          | GAACAGTACTTCGGTCCCGG (-7)       |
|                       | TTTTTCTCTGTGCCAGCAGT (-4)          | ACG   | (-3) ACAGG (-4)     |                              | CTATGAACAGTACTTCGGTCCCGG (-3)   |
|                       | TTTTTCTCTGTGCCAGCAGT (-4)          | GC    | (-1) GGACTGGGGGGC   | GT                           | TGAACAGTACTTCGGTCCCGG (-6)      |
|                       | TGTACTTCTGTGCTAGCAGTT (-4)         | C     | GGGG                |                              | CAAAACACCTTGTACTTTGGTGGC (-3)   |
|                       | TGTACTTCTGTGCTAGCAGTT (-4)         | C     | (-3) ACTGGGG (-4)   |                              | AACCAAGACACCCAGTACTTTGGGCCA     |
|                       | TTTTTCTCTGTGCCAGCAG (-5)           |       | (-3) ACTGGGGGGG     | GCGGG                        | GACACCCAGTACTTTGGGCCA (-6)      |
|                       | TGTACTTCTGTGCTAGCAGT (-5)          | CCT   | (-3) ACAGGG (-3)    |                              | AACCAAGACACCCAGTACTTTGGGCCA     |
|                       | TGTACTTCTGTGCTAGCAGT (-5)          | ATCC  | GGGACAGGGGGC        | T                            | CACCCAGTACTTTGGGCCA (-8)        |
|                       | TGTACTTCTGTGCTAGCAGT (-5)          |       | (-4) CTGG (-6)      | ACAGT                        | TATGAACAGTACTTCGGTCCCGG (-4)    |
|                       | TGTACTTCTGTGCTAGCAGT (-5)          | AC    | (-2) GACTGGGGGGC    | GCTG                         | GAACAGTACTTCGGTCCCGG (-7)       |
|                       | TGTACTTCTGTGCTAGCAG (-6)           | CTT   | GGGACAGGG (-3)      | A                            | GAACAGTACTTCGGTCCCGG (-7)       |
|                       | TGTACTTCTGTGCTAGCAG (-6)           | CCCA  | (-3) ACAGGG (-3)    | TT                           | TGAACAGTACTTCGGTCCCGG (-6)      |
|                       | TGTACTTCTGTGCTAGCAG (-6)           | CA    | (-3) ACTGGGGGGC     | GCGGT                        | CCAAGACACCCAGTACTTTGGGCCA (-2)  |
|                       | TGTACTTCTGTGCTAGCAG (-6)           | CCCC  | GGGGG               |                              | CTATGAACAGTACTTCGGTCCCGG (-3)   |
|                       | TTTTTCTCTGTGCCAGCAGTATAGcaccagtgga |       |                     | A                            | CTATGAACAGTACTTCGGTCCCGG (-3)   |

Fig. S4

| B                         |             | Dβ1/2                  | Jβ2.1                                |
|---------------------------|-------------|------------------------|--------------------------------------|
| Vβ10                      |             | GGGACAGGGGGC           | TAACTATGCTGAGCAGTTCTTCG              |
| TCTCTGTGCCAGCAGCTAAGA     |             | GGGACTGGGGGGC          |                                      |
| WT                        |             |                        |                                      |
| TCTCTGTGCCAGCAGCTAAG (-1) | <b>C</b>    | GGGAC                  | AACTATGCTGAGCAGTTCTTCG (-1)          |
| TCTCTGTGCCAGCAGCTAA (-2)  | AGG         | (-4) CAGGGGG (-1)      | <b>TTA</b> TAACTATGCTGAGCAGTTCTTCG   |
| TCTCTGTGCCAGCAGCTA (-3)   | TT          | (-5) TGGGGG (-3)       | ATGCTGAGCAGTTCTTCG (-5)              |
| TCTCTGTGCCAGCAGCTA (-3)   | <b>CC</b>   | GGGACAGGGGGC           | <b>GC</b> GCTGAGCAGTTCTTCG (-7)      |
| TCTCTGTGCCAGCAGCTA (-3)   | TCCT        | (-2) GACA (-6)         | ACGA TATGCTGAGCAGTTCTTCG (-4)        |
| TCTCTGTGCCAGCAGCTA (-3)   |             | TGGGGGGG               | GGT ACTATGCTGAGCAGTTCTTCG (-2)       |
| TCTCTGTGCCAGCAGCT (-4)    |             | (-4) CTGGGGGG (-1)     | A TATGCTGAGCAGTTCTTCG (-4)           |
| TCTCTGTGCCAGCAGCT (-4)    | CGCC        | GGGC                   | CT CTATGCTGAGCAGTTCTTCG (-3)         |
| TCTCTGTGCCAGCAGCT (-4)    | CCCGG       | (-4) CTGGGGGG (-1)     | AACTATGCTGAGCAGTTCTTCG (-1)          |
| TCTCTGTGCCAGCAGCT (-4)    | T           | (-2) GACTGGGGGG (-2)   | AACTATGCTGAGCAGTTCTTCG (-1)          |
| TCTCTGTGCCAGCAGC (-5)     | GC          | (-3) ACTGGGGGGG (-1)   | <b>GCTGA</b> ATGCTGAGCAGTTCTTCG (-5) |
| TCTCTGTGCCAGCAG (-6)      |             | (-3) ACTG (-7)         | AG AACTATGCTGAGCAGTTCTTCG (-1)       |
| TCTCTGTGCCAGCAG (-6)      | TCAAG       | GGGACAGGGG (-2)        | AGAG ATGCTGAGCAGTTCTTCG (-5)         |
| TCTCTGTGCCAGCAG (-6)      | TC          | (-1) GGGACTGGGGGG (-1) | G CTATGCTGAGCAGTTCTTCG (-3)          |
| TCTCTGTGCCAGCAG (-6)      | TCCC        | (-2) GACTGGGGGG (-2)   | TC AACTATGCTGAGCAGTTCTTCG (-1)       |
| TCTCTGTGCCAGCA (-7)       |             | (-3) ACTGGGGGGG (-1)   | CTATGCTGAGCAGTTCTTCG (-3)            |
| RAG2 <sup>FS/FS</sup>     |             |                        |                                      |
| TCTCTGTGCCAGCAGCTAAGA     | AG          | GGGACTGGGGG (-3)       | A AACTATGCTGAGCAGTTCTTCG (-1)        |
| TCTCTGTGCCAGCAGCTAAG (-1) |             | GGGG                   | TC TTC CTATGCTGAGCAGTTCTTCG (-3)     |
| TCTCTGTGCCAGCAGCTAAG (-1) | <b>TC</b>   | GGGACAGGGG (-2)        | T TGAGCAGTTCTTCG (-9)                |
| TCTCTGTGCCAGCAGCTA (-3)   |             | (-4) CAGGGGG (-1)      | ACTATGCTGAGCAGTTCTTCG (-2)           |
| TCTCTGTGCCAGCAGCTA (-3)   | TT          | (-5) TGGGGGGG (-1)     | GG TAACTATGCTGAGCAGTTCTTCG           |
| TCTCTGTGCCAGCAGCTA (-3)   | T           |                        | ACTATGCTGAGCAGTTCTTCG (-2)           |
| TCTCTGTGCCAGCAGCTA (-3)   | TCT         | GGGACT (-8)            | A AACTATGCTGAGCAGTTCTTCG (-1)        |
| TCTCTGTGCCAGCAGCT (-4)    | T           | (-1) GGACAG (-5)       | TAACTATGCTGAGCAGTTCTTCG              |
| TCTCTGTGCCAGCAGCT (-4)    | T           | GGGACAGG (-4)          | AACTATGCTGAGCAGTTCTTCG (-1)          |
| TCTCTGTGCCAGCAGCT (-4)    |             | GGGACA (-6)            | A AACTATGCTGAGCAGTTCTTCG (-1)        |
| TCTCTGTGCCAGCAGCT (-4)    | CCTTC       | (-1) GGGACTGG (-6)     | <b>A</b> TAACTATGCTGAGCAGTTCTTCG     |
| TCTCTGTGCCAGCAGCT (-4)    | <b>CCCC</b> | GGGACAGG (-4)          | ATGCTGAGCAGTTCTTCG (-5)              |
| TCTCTGTGCCAGCAGCT (-4)    | CTCGT       | (-4) CAGGGGG (-1)      | <b>A</b> TAACTATGCTGAGCAGTTCTTCG     |
| TCTCTGTGCCAGCAGCT (-4)    | T           | (-5) AGGGGGG (-1)      | TCG ATGCTGAGCAGTTCTTCG (-5)          |
| TCTCTGTGCCAGCAGCT (-4)    | T           | (-5) TGGGGGG (-2)      | CCGGGA ATGCTGAGCAGTTCTTCG (-5)       |
| TCTCTGTGCCAGCAGCT (-4)    |             | (-7) GGGGGG (-1)       | CG ACTATGCTGAGCAGTTCTTCG (-2)        |
| TCTCTGTGCCAGCAGCT (-4)    | C           | (-4) CAGGGGGG (-1)     | CTATGCTGAGCAGTTCTTCG (-3)            |
| TCTCTGTGCCAGCAGC (-5)     | <b>CCCC</b> | GGGACA (-6)            | AT ACTATGCTGAGCAGTTCTTCG (-2)        |
| TCTCTGTGCCAGCAGC (-5)     | <b>CC</b>   | GGGACAGGGG (-4)        | TATGCTGAGCAGTTCTTCG (-4)             |
| TCTCTGTGCCAGCAGC (-5)     | <b>ACC</b>  | GGGACTGGGGGG           | T CTATGCTGAGCAGTTCTTCG (-3)          |
| TCTCTGTGCCAGCAGC (-5)     | A           | GGGACAG (-5)           | C AACTATGCTGAGCAGTTCTTCG (-1)        |
| TCTCTGTGCCAGCAGC (-5)     | <b>AACC</b> | GGGACT (-8)            | T TAACTATGCTGAGCAGTTCTTCG            |
| TCTCTGTGCCAGCAGC (-5)     | CCC         | (-2) GACTGGGGG (-3)    | AT CTATGCTGAGCAGTTCTTCG (-3)         |
| TCTCTGTGCCAGCAGC (-5)     | CCTC        | (-6) GGGGGG (-1)       | A AACTATGCTGAGCAGTTCTTCG (-1)        |
| TCTCTGTGCCAGCAGC (-5)     | CGTGAC      | GGG                    | ATGCTGAGCAGTTCTTCG (-5)              |
| TCTCTGTGCCAGCAGC (-5)     | CCC         | (-2) GACAGGG (-3)      | <b>A</b> TAACTATGCTGAGCAGTTCTTCG     |
| TCTCTGTGCCAGCAGC (-5)     | <b>CCCC</b> | GGGACT (-8)            | TG AACTATGCTGAGCAGTTCTTCG (-1)       |
| TCTCTGTGCCAGCAG (-6)      | TTT         | GGGAC (-7)             | CGAAA TATGCTGAGCAGTTCTTCG (-4)       |
| TCTCTGTGCCAGCAG (-6)      | <b>GTCC</b> | GGGACAGGGG             | GG ATGCTGAGCAGTTCTTCG (-5)           |
| TCTCTGTGCCAGCAG (-6)      | GAA         | (-2) GACAGG (-4)       | TT ACTATGCTGAGCAGTTCTTCG (-2)        |
| TCTCTGTGCCAGC (-8)        | <b>CC</b>   | GGGACTGGGG (-4)        | CTATGCTGAGCAGTTCTTCG (-3)            |
| TCTCTGTGCCAGC (-8)        |             | (-5) TGGGGGG (-2)      | T CTATGCTGAGCAGTTCTTCG (-3)          |

Fig. S4

C

|                            |               |                     |                 |                                 |
|----------------------------|---------------|---------------------|-----------------|---------------------------------|
| Vβ14<br>CCTCTGTGCCTGGAGTCT |               | Dβ1<br>GGGACAGGGGGC |                 | Jβ1.1<br>CAAACACAGAAGTCTTCTTTGG |
| WT                         |               |                     |                 |                                 |
| CCTCTGTGCCTGGAGTCT         | <b>AGTG</b>   | CAGG                |                 | CAAACACAGAAGTCTTCTTTGG          |
| CCTCTGTGCCTGGAGTCT         | <b>AG</b>     | GGGACAGGGGG         | T               | CAAACACAGAAGTCTTCTTTGG          |
| CCTCTGTGCCTGGAGTCT         | <b>G</b>      | AGGG                | <b>AAG</b>      | CAAACACAGAAGTCTTCTTTGG          |
| CCTCTGTGCCTGGAGTCT         |               | GG                  | <b>TTCCTTAC</b> | CAAACACAGAAGTCTTCTTTGG          |
| CCTCTGTGCCTGGAGTCT         | <b>ATT</b>    | GGGG                |                 | AACACAGAAGTCTTCTTTGG (-2)       |
| CCTCTGTGCCTGGAGTCT         | <b>A</b>      | GACA                | ATA             | AGAAGTCTTCTTTGG (-7)            |
| CCTCTGTGCCTGGAGTCT         | <b>AGA</b>    | GC                  | T               | GTCTTCTTTGG (-11)               |
| CCTCTGTGCCTGGAGTCT         |               | GGGACAG             | C               | AACACAGAAGTCTTCTTTGG (-2)       |
| CCTCTGTGCCTGGAGTCT (-1)    | <b>CAGACC</b> | GGGACAGGGGGC        | <b>GGAGG</b>    | AGTCTTCTTTGG (-10)              |
| CCTCTGTGCCTGGAGTCT (-2)    | <b>TCA</b>    | GGGACAGGGGGC        |                 | AAACACAGAAGTCTTCTTTGG (-1)      |
| CCTCTGTGCCTGGAGTCT (-4)    |               | ACAGGGG             |                 | ACAGAAGTCTTCTTTGG (-5)          |
| CCTCTGTGCCTGGAGTCT (-7)    | <b>C</b>      | GGGACAGGG           | <b>AAGG</b>     |                                 |

|                         |               |              |             |                            |
|-------------------------|---------------|--------------|-------------|----------------------------|
| RAG2 <sup>FS/FS</sup>   |               |              |             |                            |
| CCTCTGTGCCTGGAGTCT      | <b>AGGC</b>   | AC           | TA          | CAAACACAGAAGTCTTCTTTGG     |
| CCTCTGTGCCTGGAGTCT      | <b>AG</b>     | AGGGG        | <b>TC</b>   | CAAACACAGAAGTCTTCTTTGG     |
| CCTCTGTGCCTGGAGTCT      | <b>G</b>      | AGGG         | <b>AAG</b>  | CAAACACAGAAGTCTTCTTTGG     |
| CCTCTGTGCCTGGAGTCT      | <b>AT</b>     | AGGG         |             | AAACACAGAAGTCTTCTTTGG (-1) |
| CCTCTGTGCCTGGAGTCT      |               | AGGGGG       | G           | AACACAGAAGTCTTCTTTGG (-2)  |
| CCTCTGTGCCTGGAGTCT      | <b>ACC</b>    | GACAG        | T           | CAGAAGTCTTCTTTGG (-6)      |
| CCTCTGTGCCTGGAGTCT      | <b>A</b>      | GACAGGG      | AC          | CAGAAGTCTTCTTTGG (-6)      |
| CCTCTGTGCCTGGAGTCT      | <b>TTA</b>    | ACAGGGGGC    | <b>AA</b>   | AAGTCTTCTTTGG (-9)         |
| CCTCTGTGCCTGGAGTCT (-1) | <b>GAAGGG</b> | <b>AGGGG</b> | T           | CACAGAAGTCTTCTTTGG (-4)    |
| CCTCTGTGCCTGGAGTCT (-1) |               | GACAG        | ATGT        | CAGAAGTCTTCTTTGG (-6)      |
| CCTCTGTGCCTGGAGTCT (-2) | <b>GT</b>     | AG           | <b>TAAC</b> | CACAGAAGTCTTCTTTGG (-4)    |
| CCTCTGTGCCTGGAGTCT (-3) |               | CAGGGGG      | <b>G</b>    | CAAACACAGAAGTCTTCTTTGG     |
| CCTCTGTGCCTGGAGTCT (-5) | <b>GAT</b>    | ACAGG        | <b>TTT</b>  | AGAAGTCTTCTTTGG (-7)       |
| CCTCTGTGCCTGGAGTCT (-8) | <b>CT</b>     | CAGGG        | <b>GTG</b>  | CAAACACAGAAGTCTTCTTTGG     |

|                                            |  |               |  |                                   |
|--------------------------------------------|--|---------------|--|-----------------------------------|
| D                                          |  |               |  |                                   |
| Dβ2                                        |  |               |  |                                   |
| ttttt <del>gtat</del> atcacgatgtaaacattgtg |  | GGGACTGGGGGGC |  | CTCCTATGAACAGTACTTCGGTCCCGG Jβ2.6 |
|                                            |  |               |  | AACCAAGACACCCAGTACTTTGGGCCA Jβ2.5 |
|                                            |  |               |  | AGTCAAACACCTTGTACTTTGGTGCG Jβ2.4  |

|                                            |  |                    |             |                                |
|--------------------------------------------|--|--------------------|-------------|--------------------------------|
| WT                                         |  |                    |             |                                |
| ttttt <del>gtat</del> atcacgatgtaaacattgtg |  | GGGACTGGGGGGC      | <b>GC</b>   | CCAAGACACCCAGTACTTTGGGCCA (-2) |
| ttttt <del>gtat</del> atcacgatgtaaacattgtg |  | GGGACTGGGGGGC      | <b>GAT</b>  | CAAGACACCCAGTACTTTGGGCCA (-3)  |
| ttttt <del>gtat</del> atcacgatgtaaacattgtg |  | GGGACTGGGGGGC      | <b>CTT</b>  | AGACACCCAGTACTTTGGGCCA (-5)    |
| ttttt <del>gtat</del> atcacgatgtaaacattgtg |  | GGGACTGGGGGGC      | <b>GCT</b>  | TGAACAGTACTTCGGTCCCGG (-6)     |
| ttttt <del>gtat</del> atcacgatgtaaacattgtg |  | GGGACTGGGGGGC      | <b>CC</b>   | CACCCAGTACTTTGGGCCA (-8)       |
| ttttt <del>gtat</del> atcacgatgtaaacattgtg |  | GGGACTGGGGGGG (-1) | T           | TCCCGG (-21)                   |
| ttttt <del>gtat</del> atcacgatgtaaacattgtg |  | GGGACTGGGGGGG (-1) | G           | CTATGAACAGTACTTCGGTCCCGG (-3)  |
| ttttt <del>gtat</del> atcacgatgtaaacattgtg |  | GGGACTGGGGGGG (-1) | GT          | TATGAACAGTACTTCGGTCCCGG (-4)   |
| ttttt <del>gtat</del> atcacgatgtaaacattgtg |  | GGGACTGGGGGGG (-1) | GG          | CCAAGACACCCAGTACTTTGGGCCA (-2) |
| ttttt <del>gtat</del> atcacgatgtaaacattgtg |  | GGGACTGGGGGGG (-1) |             | AAGACACCCAGTACTTTGGGCCA (-4)   |
| ttttt <del>gtat</del> atcacgatgtaaacattgtg |  | GGGACTGGGGGGG (-2) | T           | TGAACAGTACTTCGGTCCCGG (-6)     |
| ttttt <del>gtat</del> atcacgatgtaaacattgtg |  | GGGACTGGGGGGG (-2) | AGGCG       | GACACCCAGTACTTTGGGCCA (-6)     |
| ttttt <del>gtat</del> atcacgatgtaaacattgtg |  | GGGACTGGGGGGG (-3) |             | CCAAGACACCCAGTACTTTGGGCCA (-2) |
| ttttt <del>gtat</del> atcacgatgtaaacattgtg |  | GGGACTGGGGG (-5)   | <b>CCTT</b> | AACCAAGACACCCAGTACTTTGGGCCA    |
| ttttt <del>gtat</del> atcacgatgtaaacattgtg |  | GGGACTGGGG (-5)    | <b>TT</b>   | AACCAAGACACCCAGTACTTTGGGCCA    |

|                                            |  |                    |               |                                 |
|--------------------------------------------|--|--------------------|---------------|---------------------------------|
| RAG2 <sup>FS/FS</sup>                      |  |                    |               |                                 |
| ttttt <del>gtat</del> atcacgatgtaaacattgtg |  | GGGACTGGGGGGC      | ACGAG         | CCAAGACACCCAGTACTTTGGGCCA (-2)  |
| ttttt <del>gtat</del> atcacgatgtaaacattgtg |  | GGGACTGGGGGGC      | <b>GCAGG</b>  | CCAAGACACCCAGTACTTTGGGCCA (-2)  |
| ttttt <del>gtat</del> atcacgatgtaaacattgtg |  | GGGACTGGGGGGG      | <b>CGC</b>    | CCAAGACACCCAGTACTTTGGGCCA (-2)  |
| ttttt <del>gtat</del> atcacgatgtaaacattgtg |  | GGGACTGGGGGGG      |               | TCCTATGAACAGTACTTCGGTCCCGG (-1) |
| ttttt <del>gtat</del> atcacgatgtaaacattgtg |  | GGGACTGGGGGGG      | <b>CTT</b>    | AGTCAAACACCTTGTACTTTGGTGCG      |
| ttttt <del>gtat</del> atcacgatgtaaacattgtg |  | GGGACTGGGGGGG      |               | CCAAGACACCCAGTACTTTGGGCCA (-2)  |
| ttttt <del>gtat</del> atcacgatgtaaacattgtg |  | GGGACTGGGGGGG      |               | CCAAGACACCCAGTACTTTGGGCCA (-2)  |
| ttttt <del>gtat</del> atcacgatgtaaacattgtg |  | GGGACTGGGGGGG      |               | GACACCCAGTACTTTGGGCCA (-6)      |
| ttttt <del>gtat</del> atcacgatgtaaacattgtg |  | GGGACTGGGGGGG (-1) | <b>AAACT</b>  | AGTCAAACACCTTGTACTTTGGTGCG      |
| ttttt <del>gtat</del> atcacgatgtaaacattgtg |  | GGGACTGGGGGGG (-1) | G             | ACACCTTGTACTTTGGTGCG (-7)       |
| ttttt <del>gtat</del> atcacgatgtaaacattgtg |  | GGGACTGGGGGGG (-1) |               | AGACACCCAGTACTTTGGGCCA (-5)     |
| ttttt <del>gtat</del> atcacgatgtaaacattgtg |  | GGGACTGGGGGGG (-2) | TG            | AACACCTTGTACTTTGGTGCG (-6)      |
| ttttt <del>gtat</del> atcacgatgtaaacattgtg |  | GGGACTGGGGGGG (-3) | AT            | TATGAACCTTGGTCCCGG (-4)         |
| ttttt <del>gtat</del> atcacgatgtaaacattgtg |  | GGGACTGGGGGGG (-3) |               | TTTGGGCCA (-18)                 |
| ttttt <del>gtat</del> atcacgatgtaaacattgtg |  | GGGACTGGGGG (-4)   |               | AACCAAGACACCCAGTACTTTGGGCCA     |
| ttttt <del>gtat</del> atcacgatgtaaacattgtg |  | GGGACTGGGG (-5)    | AG            | GACACCCAGTACTTTGGGCCA (-6)      |
| ttttt <del>gtat</del> atcacgatgtaaacattgtg |  | GGGACTGGG (-6)     | <b>TGGATG</b> | AAAACACCTTGTACTTTGGTGCG (-4)    |

Fig.S4

**E**

Vh7183  
CTTGTATTACTGTGCAAGACA  
AGCCATGTATTACTGTGCAAGAGA

TTTATTACTACGGTAGTAGCTAC  
TCTATGATGGTTACTAC  
TCTACTATGATTACGAC  
CCTACTATAGTAACTAC  
TCTACTATGGTTACGAC  
TCTACTATGGTAACTAC  
CTAACTGGGAC

Jh4  
ATTACTATGCTATGGACTACTGG

**WT**

CTTGTATTACTGTGCAAGACA  
CTTGTATTACTGTGCAAGACA  
CATGTATTACTGTGCAAGAGA  
CTTGTATTACTGTGCAAGAC (-1)  
CTTGTATTACTGTGCAAGAC (-1)  
CATGTATTACTGTGCAAGAG (-1)  
CATGTATTACTGTGCAAGAG (-1)  
CTTGTATTACTGTGCAAGA (-2)  
CTTGTATTACTGTGCAAG (-3)  
CTTGTATTACTGTGCAAG (-3)  
CTTGTATTACTGTGCAAG (-3)  
CTTGTATTACTGTGCAAG (-3)  
CTTGTATTACTGTGCAAG (-3)  
CATGTATTACTGTGCAAG (-3)  
CTTGTATTACTGTGCA (-5)  
CTTGTATTACTGTGC (-6)  
CTTGTATTACTGTGC (-6)

GGGGGAT  
**TGG**  
GAGGAC  
TTC CCTGA  
G  
G  
GTGGG  
GCCCTC  
G  
GTCAA  
GT  
CCGCC  
CTTGAACGA

GGGT  
CTACTATGATTAC  
TTACTACG  
TATGATTACGAC  
GGTAA  
TCTACTATGATTA  
ACTGGGAC  
ATTACTACGGTAGTAGC  
CTACGGTAGT  
ATGGTTAC  
TCTACT  
TACTATGG  
CGTCAAGG  
TCTACTATGGTAACTAC  
TAECTGGAC  
TGATGGT  
TTTATTACTACGGTAGTAGCTAC

GTTCCCCGC  
AGAATGCTGA  
GGGG  
GGGGGTTTCAT  
GGGG  
GTC  
G  
CCC  
TC  
CG  
GAGAAAGAGGGT  
GGG  
TGGGA  
CT  
CGTGA

TATGCTATGGACTACTGG (-5)  
ATGGACTACTGG (-11)  
GGACTACTGG (-13)  
CTATGCTATGGACTACTGG (-4)  
CTATGCTATGGACTACTGG (-4)  
CTATGCTATGGACTACTGG (-4)  
ACTATGCTATGGACTACTGG (-3)  
ATGCTATGGACTACTGG (-6)  
ATTACTATGCTATGGACTACTGG  
TTACTATGCTATGGACTACTGG (-1)  
ACTATGCTATGGACTACTGG (-3)  
CTATGCTATGGACTACTGG (-4)  
ATGCTATGGACTACTGG (-6)  
GCTATGGACTACTGG (-8)  
GCTATGGACTACTGG (-8)  
CTATGCTATGGACTACTGG (-4)  
TGGACTACTGG (-12)

**RAG2<sup>FS/FS</sup>**

CTTGTATTACTGTGCAAGACA  
CATGTATTACTGTGCAAGAGA  
CTTGTATTACTGTGCAAGACA  
CTTGTATTACTGTGCAAGACA  
CTTGTATTACTGTGCAAGACA  
CATGTATTACTGTGCAAGAGA  
CTTGTATTACTGTGCAAGACA  
CTTGTATTACTGTGCAAGACA  
CATGTATTACTGTGCAAGAGA  
CTTGTATTACTGTGCAAGAGA  
CATGTATTACTGTGCAAGAGA  
CATGTATTACTGTGCAAGAG (-1)  
CTTGTATTACTGTGCAAGAC (-1)  
CTTGTATTACTGTGCAAGA (-2)  
CTTGTATTACTGTGCAAGA (-2)  
CTTGTATTACTGTGCAAGA (-2)  
CTTGTATTACTGTGCAAGA (-2)  
CATGTATTACTGTGCAAG (-3)  
AGCCATGTATTACTGTGC (-6)  
CATGTATTACTGT (-8)

CG  
**TGGG**  
**TGG**  
**TG**  
**TAG**  
GTCGGCT  
C  
G  
CCT  
ACGAGAGATGGGG

ATGATTAC  
GGGAC  
TTTAT  
TGAT  
ACTATAGTAACTAC  
TGATTACGAC  
TAAC  
TTATTACTACGGTAGTAG  
TACTACGG  
TTACTA  
CTATAGTAACTAC  
GGG  
CCTACTATAGTAACT  
G  
CATGATACTAAGG  
TACTATATAGTAACTA  
TACTACGG  
GGGAAGGAG  
TCTACTATGG  
CTACTATAGTAACTAC  
CCTACTATA

CCTT  
CGCT  
ACGTCCTT  
TT  
G  
CCGG  
AA  
G  
TAGTG  
GAAGTTAC  
T  
TTATCCTC  
TTTAAGG  
GG  
CCCT  
GG  
CG

ATTACTATGCTATGGACTACTGG  
ATTACTATGCTATGGACTACTGG  
ATTACTATGCTATGGACTACTGG  
ATTACTATGCTATGGACTACTGG  
TTACTATGCTATGGACTACTGG (-1)  
TACTATGCTATGGACTACTGG (-2)  
ACTATGCTATGGACTACTGG (-3)  
ACTATGCTATGGACTACTGG (-3)  
CTATGCTATGGACTACTGG (-4)  
ATGCTATGGACTACTGG (-6)  
ATGCTATGGACTACTGG (-6)  
GCTATGGACTACTGG (-8)  
ATTACTATGCTATGGACTACTGG  
GGACTACTGG (-13)  
ACTATGCTATGGACTACTGG (-3)  
CTATGCTATGGACTACTGG (-4)  
TGCTATGGACTACTGG (-7)  
GCTATGGACTACTGG (-8)  
TATGGACTACTGG (-10)  
TGCTATGGACTACTGG (-7)  
ATGCTATGGACTACTGG (-6)

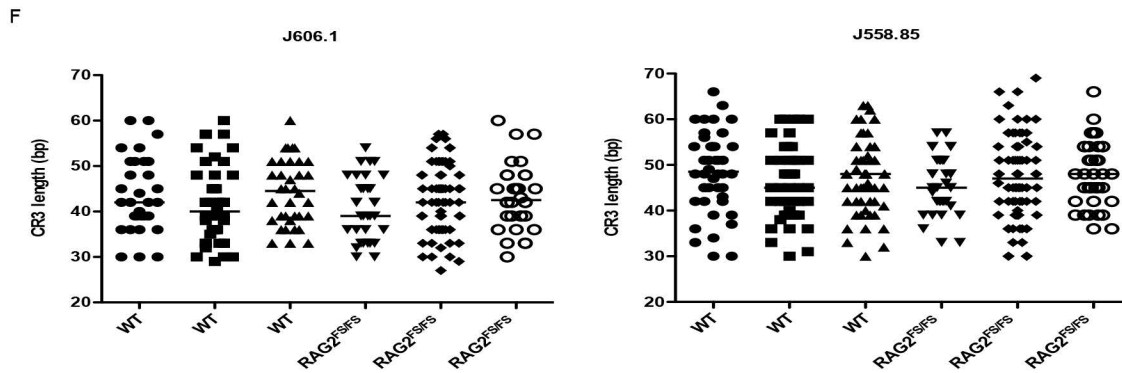

Fig.S4

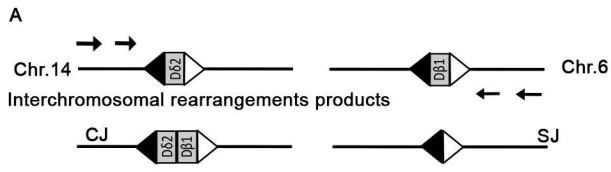

B

**Dβ2**

GGTTTTTGCAAAGCTCTGTAGCACCGTG  
 GGTTTTTGCAAAGCTCTGTAGCACCGTG  
 GGTTTTTGCAAAGCTCTGTAGCACCGTG TCC  
 GGTTTTTGCAAAGCTCTGTAGCACCG (-2) CGTCC  
 GGTTTTTGCAAAGCTCTGTAGCACCG (-2) CG  
 GGTTTTTGCAAAG (-15) G  
 GGTTTTTGCAA (-17) TAGG  
 GGTT(-24)  
 CCCA(-33)  
 AAAG(-37) GCTG  
 attccaaggttt

**Dβ1**

CACGGTGATTCAATTCTATGGGAAGCCTTTACAAAAACC  
 CACGGTGATTCAATTCTATGGGAAGCCTTTACAAAAACC  
 CACGGTGATTCAATTCTATGGGAAGCCTTTACAAAAACC  
 CACGGTGATTCAATTCTATGGGAAGCCTTTACAAAAACC  
 CACGGTGATTCAATTCTATGGGAAGCCTTTACAAAAACC  
 GATTCAATTCTATGGGAAGCCTTTACAAAAACC (-6)  
 GATTCAATTCTATGGGAAGCCTTTACAAAAACC (-6)  
 CTGT (-42)  
 CAATTCTATGGGAAGCCTTTACAAAAACC (-10)  
 TGGGAAGCCTTTACAAAAACC (-18)  
 GGAAGCCTTTACAAAAACC (-19)

Fig. S5

A **Origin of Adjacent Direct Repeats**

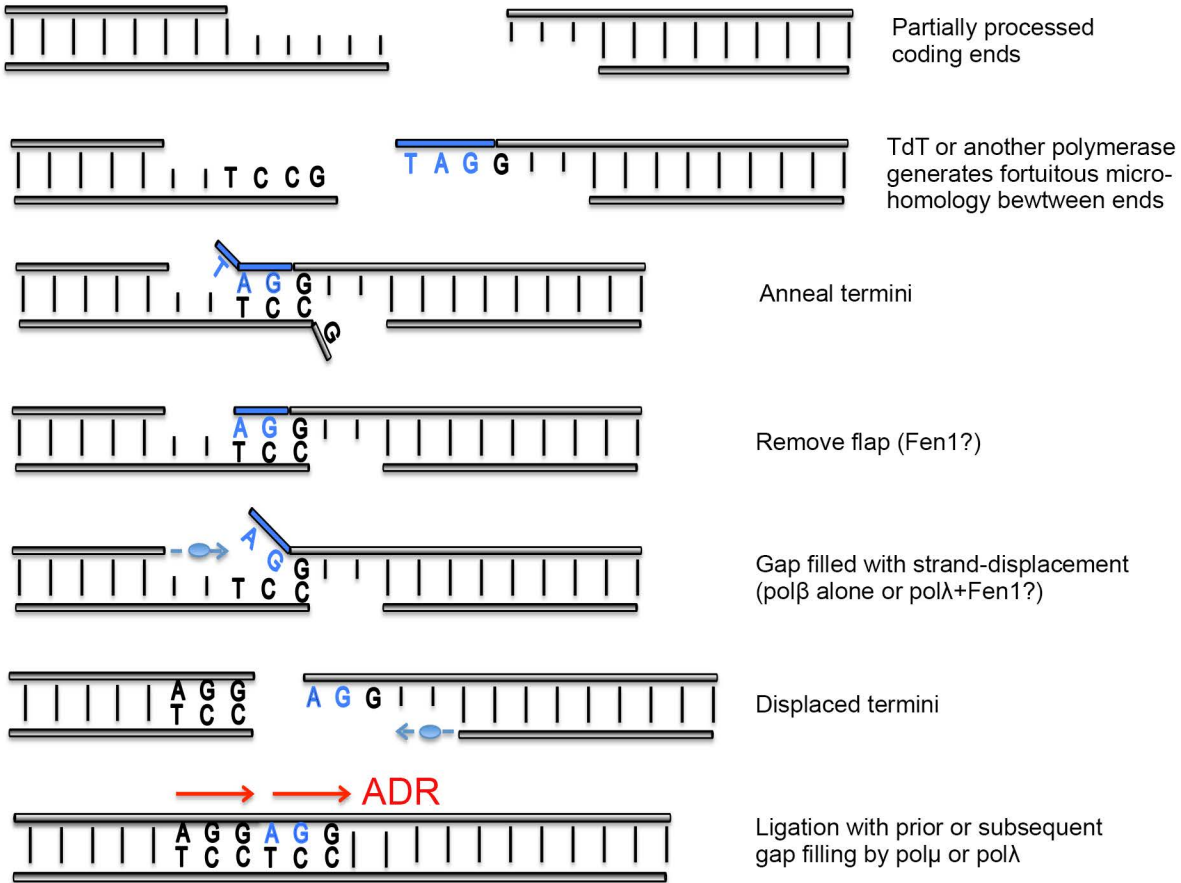

B

|                               | Genotype                                    | Vβ14-Jβ1.1 | Vβ10-Jβ2.1 | Vβ6/7/8-Jβ2 | Dβ2-Jβ2.6 |
|-------------------------------|---------------------------------------------|------------|------------|-------------|-----------|
| Talukder SR et al (25)        | WT                                          | 3/40       | 1/30       | nd          | nd        |
| Zhang L et al (Supp Info, 23) | WT                                          | 3/47       | nd         | nd          | nd        |
| Gigi V et al (This study)     | WT                                          | 1/11       | 0/16       | 0/23        | 0/15      |
| Gigi V et al (This study)     | RAG2 <sup>FS/FS</sup>                       | 1/14       | 0/32       | 2/31        | 2/17      |
| Gigi V et al (This study)     | RAG2 <sup>FS/FS</sup> ; Ku80 <sup>-/-</sup> | 5/22       | 1/12       | nd          | nd        |

Fig.S6

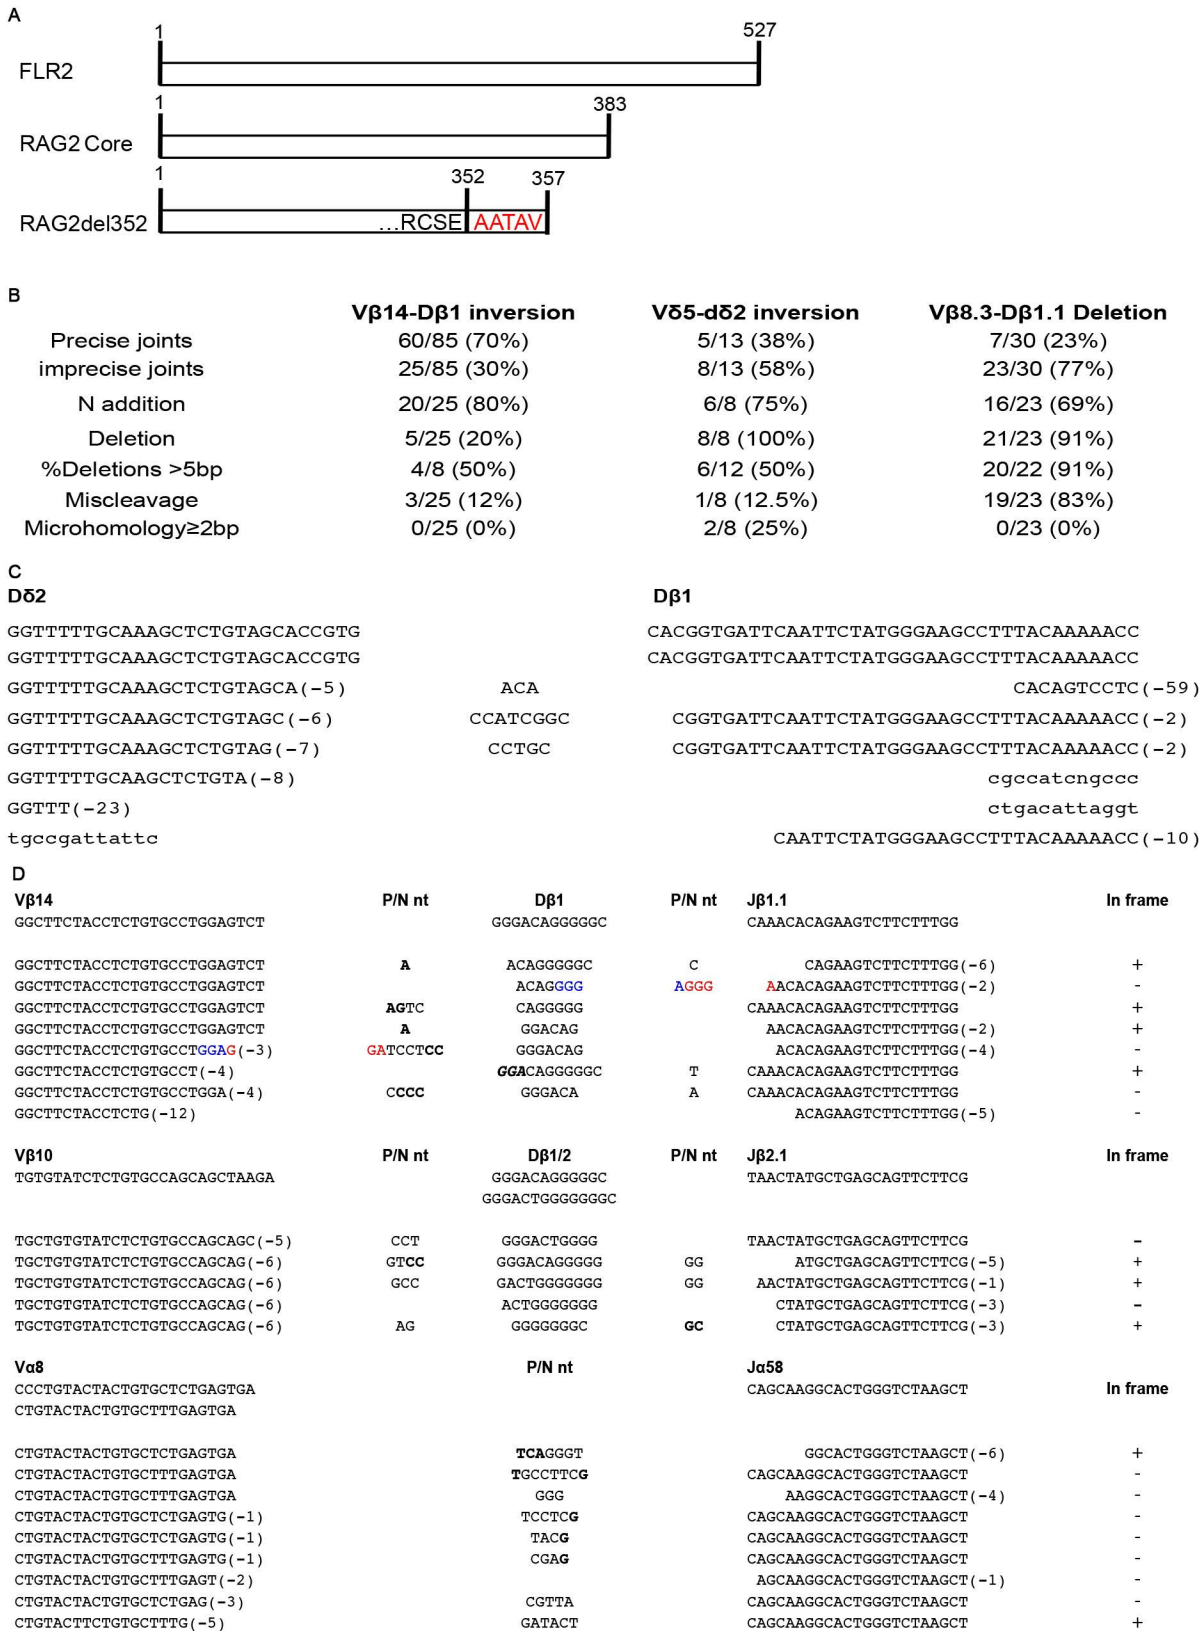

Fig. S7

A

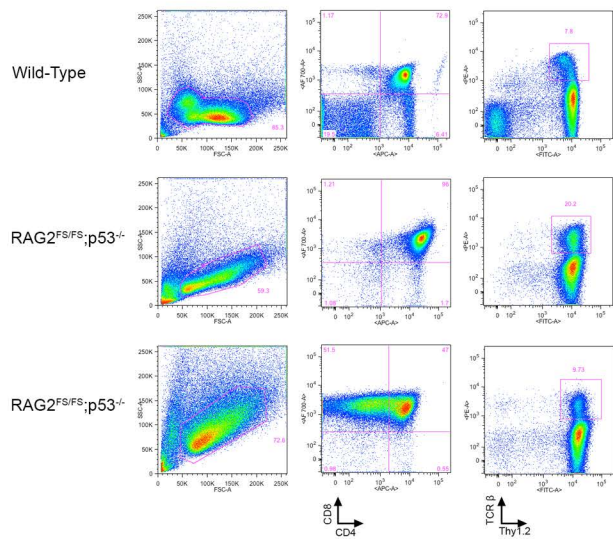

B

|   | End1 (23RSS)         | P/N nt    | End2 (12RSS)           |           |     |
|---|----------------------|-----------|------------------------|-----------|-----|
| 1 | GCAAATACCTTGTGAAAGCC | CCAACCCCT | ATCCAGACTGCACAGTAGTA   | TCRg      | Del |
| 2 | CTTGTGAAAACCTGAGCTAT | CGTA      | TGTACTGTTCTCTTGAGAATCG | TCRg      | Del |
| 3 | GCGGTGATGGGGACAGGGGG | AAG       | AACACAGAAGTCTTCTTTGGTA | TCRb      | Del |
| 4 | GTGCCTTGCCCCAGTAGTC  | CCT       | TCCCAGTTAGCACTGTGGTGCT | IgA       | Del |
| 5 | AACATTGTGGGACAGGGGG  | AAG       | AACACAGAAGTCTTCTTTGGTA | Db1-Jb1.1 | Del |
| 6 | ACATTGTGGGACAGGGGGC  | GA        | GAACAGTACTTCGGTCCCGCA  | Db1-Jb2.6 | Del |
| 7 | TACCACTGCCTTCGGGGAGA | CCTT      | TTCCAATACCAACAAAGTCGTC | TCRa      | Del |

Fig. S8
